# Supplementary material for: Single-phase ultrathin holey nanoflower Ni5P4 as a bifunctional electrocatalyst for efficient water splitting
Source: Royal Society of Chemistry journal article supplement (doi:10.1039/d3dt00935a), 2023-01-01
Supplement: d3dt00935a1.pdf [file d3dt00935a1.pdf]

## Supporting Information

### Single-phase ultrathin holey nanoflower $\text{Ni}_5\text{P}_4$ as bifunctional electrocatalyst for efficient water splitting

Lihua Yao<sup>a,1</sup>, Zhuo Qiu<sup>a,1</sup>, Xingliang Yin<sup>b</sup>, Ying Yang<sup>a</sup>, Xiaodi Hong<sup>a</sup>, Zhi Yang<sup>a,\*</sup>

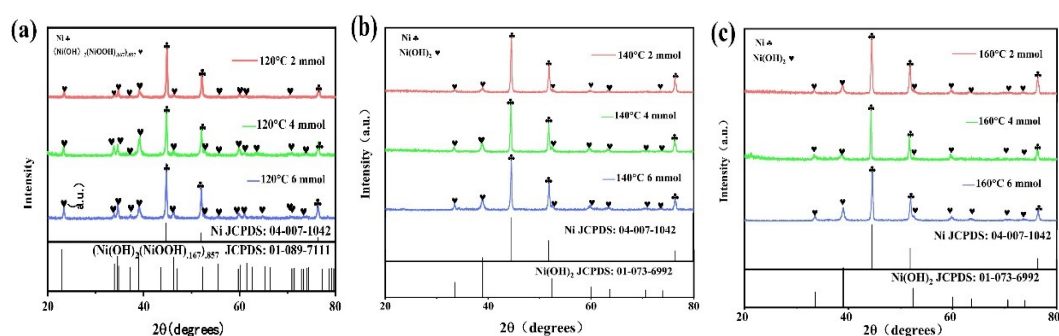

**Fig.S1.** XRD of precursor of Nickel phosphide which prepared with different concentrations of  $\text{Ni}(\text{NO}_3)_2 \cdot 6\text{H}_2\text{O}$  (2, 4, 6 mmol), (a) hydrothermal temperatures 120 °C; (b) hydrothermal temperatures 140 °C; (c) hydrothermal temperatures 160 °C.

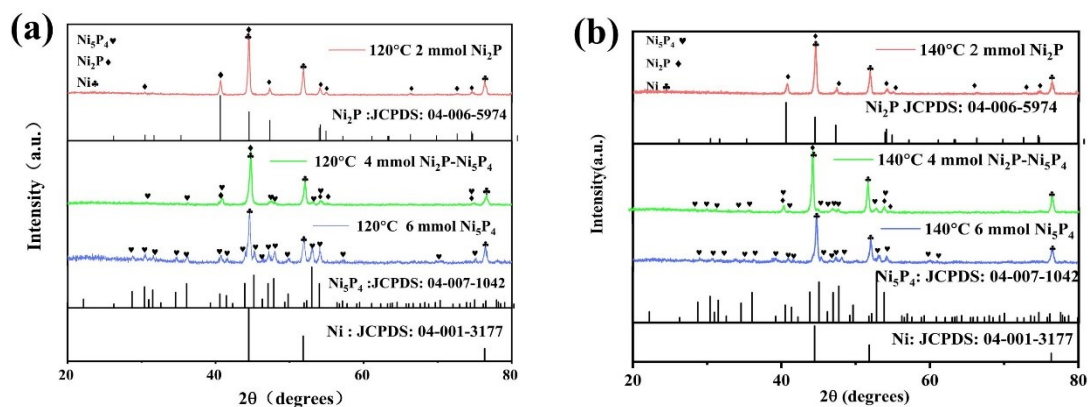

**Fig. S2.** XRD of Nickel phosphide that of precursor was prepared with different concentrations of  $\text{Ni}(\text{NO}_3)_2 \cdot 6\text{H}_2\text{O}$  (2, 4, 6mmol) and different hydrothermal temperature, (a) hydrothermal temperatures 120 °C; (b) hydrothermal temperatures 140 °C.

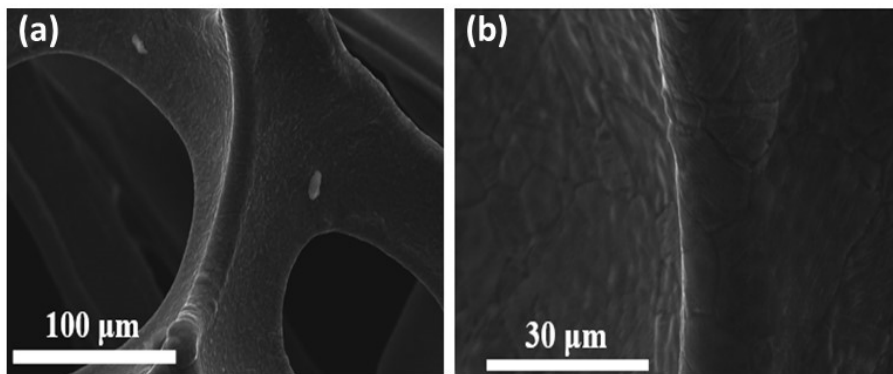

Fig. S3 (a) (b) SEM images of the NF.

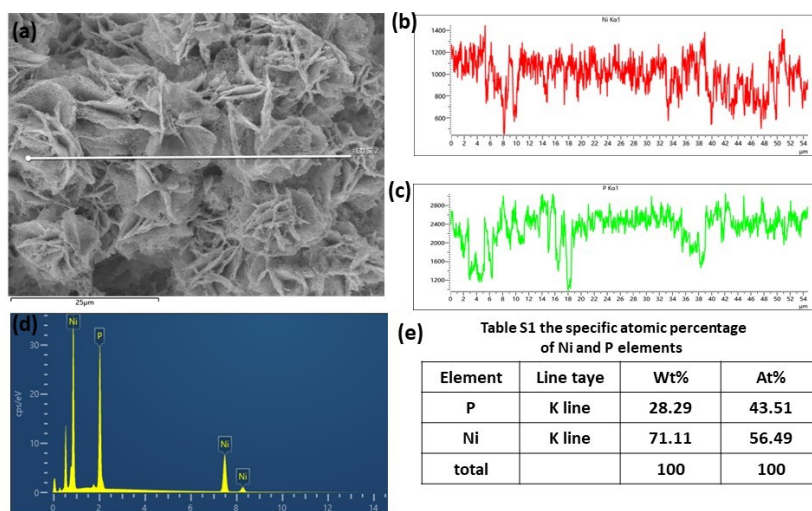

Fig. S4. (a b c d) Energy Dispersive Spectrum (EDS) of 3D SHF-Ni<sub>5</sub>P<sub>4</sub>; (e) The specific atomic percentage of Ni and P elements of 3D SHF-Ni<sub>5</sub>P<sub>4</sub>.

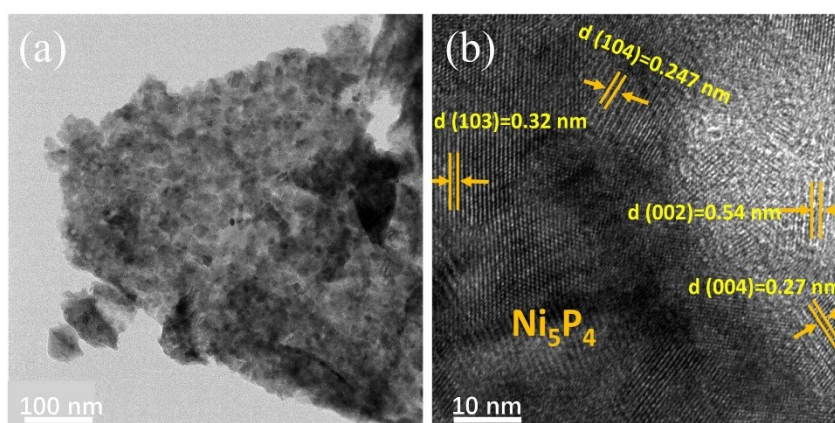

Fig. S5. TEM micrographs (a) of 3D SHF-Ni<sub>5</sub>P<sub>4</sub>; (c) HR-TEM image of 3D SHF-Ni<sub>5</sub>P<sub>4</sub>.

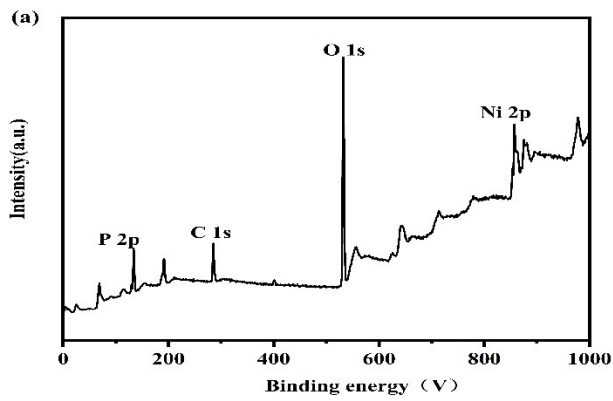

Fig. S6. A scan survey spectrum of 3D SHF- $\text{Ni}_5\text{P}_4$

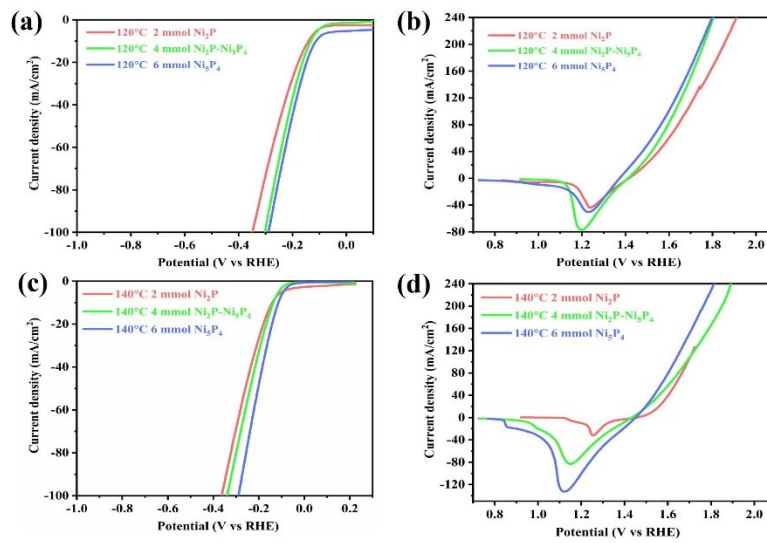

Fig.S7. LSV polarization curve of nickel phosphide that of the precursor prepared with 2mmol, 4mmol, and 6mmol of  $\text{Ni}(\text{NO}_3)_2 \cdot 6\text{H}_2\text{O}$  solution at the different temperature in hydrothermal process; (a),(b) HER and OER of nickel phosphide precursor were prepared at 120 °C; (c),(d) HER and OER of nickel phosphide precursor were prepared at 140 °C.

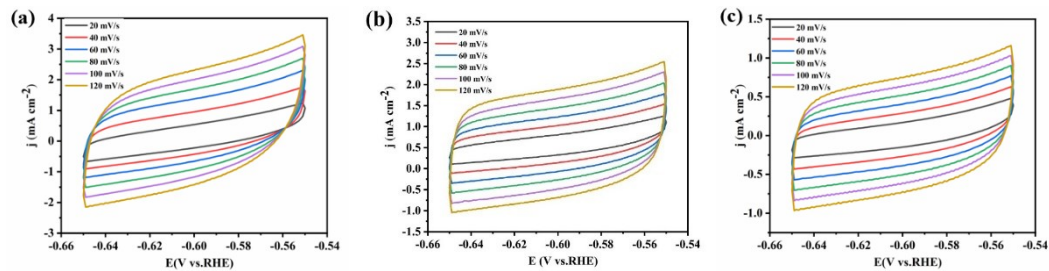

Fig. S8. OER CVs of (a) 3D SHF-  $\text{Ni}_5\text{P}_4$ ; (b)  $\text{Ni}_5\text{P}_4$ -4; (c)  $\text{Ni}_5\text{P}_4$ -2 in 1 M KOH solution at scan rates of 20, 40, 60, 80, 100, and 120 mV/s, respectively.

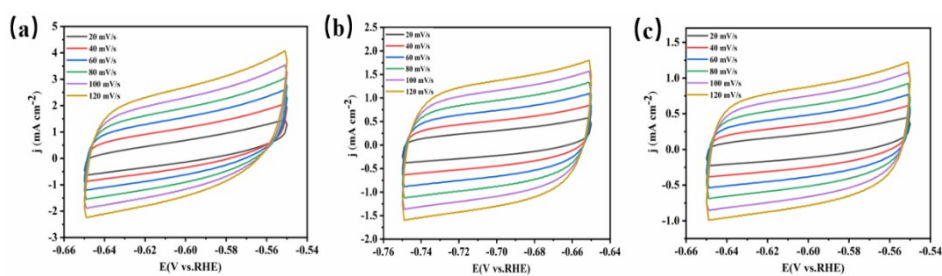

**Fig. S9.** HER CVs of (a) 3D SHF- Ni<sub>5</sub>P<sub>4</sub>; (b) Ni<sub>5</sub>P<sub>4</sub>-4; (c) Ni<sub>5</sub>P<sub>4</sub>-2 in 1 M KOH solution at scan rates of 20, 40, 60, 80, 100, and 120 mV/s, respectively.

### Calculation of TOF values

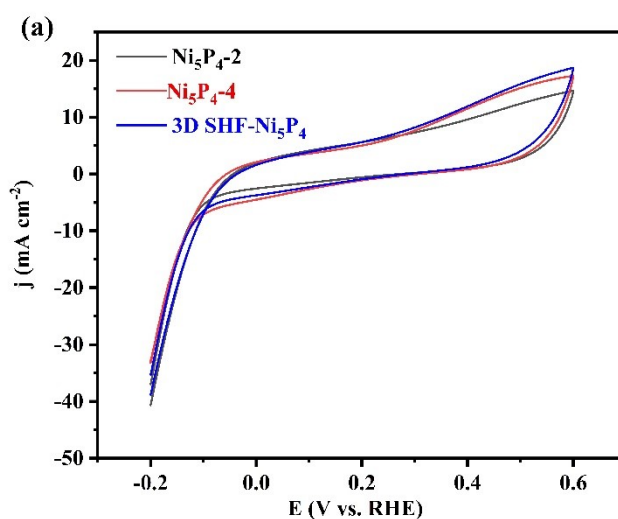

**Fig. S10.** (a) CV curves of Ni<sub>5</sub>P<sub>4</sub>-2, Ni<sub>5</sub>P<sub>4</sub>-4 and 3D SHF-Ni<sub>5</sub>P<sub>4</sub> in 1.0 M KOH solution at a scan rate of 50 mV s<sup>-1</sup>.

The TOF values are calculated via the following equation:

$$TOF = \frac{J}{mFn}$$

**m:** electrons are consumed to form one H<sub>2</sub> or O<sub>2</sub> molecule from water (2electrons for HER, 4 electrons for OER)

**J (mA cm<sup>-2</sup>):** the current density at a fixed overpotential (OER 300mV, HER 200mV), during the LSV measurement in 1.0M KOH solution.

**F:** represents the Faraday constant (96485 C),

$n$ : the total number of moles of active sites. The number of active sites ( $n$ ) can be measured by a formerly reported method,  $n = Q/2F$

$Q$ : the cyclic voltametric charge capacity obtained by integrating the CV curves. The CV curve was tested in 1.0 M KOH solution at -0.2-0.6 V (vs. RHE) with a sweep rate of 50 mV s<sup>-1</sup>.

#### For OER of 3D SHF-Ni<sub>5</sub>P<sub>4</sub>, determination of Turnover Frequency (TOF)

$$n = \frac{Q}{2F} = \frac{11.59}{2 \times 96485} = 6.01 \times 10^{-5}$$

$$TOF = \frac{J}{mFn} = \frac{65.54}{4 \times 96485 \times 6.01 \times 10^{-5}} = 2.83 \text{ s}^{-1}$$

#### Post electrolysis characterization

To gain further insight into the catalyst transformation following electrocatalysis, XRD, SEM, and XPS have been conducted to analyze 3D SHF- Ni<sub>5</sub>P<sub>4</sub> after electrocatalytic stability test.

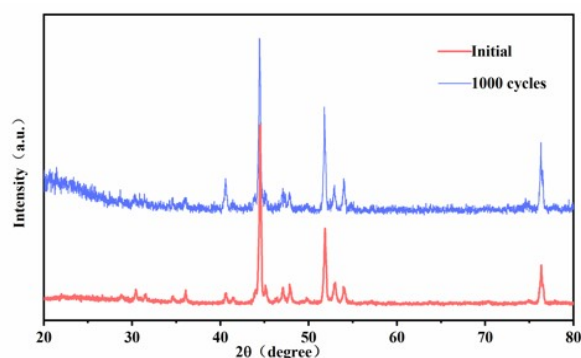

Fig. S11. The XRD spectra of 3D SHF- Ni<sub>5</sub>P<sub>4</sub> for OER after 1000 cycles.

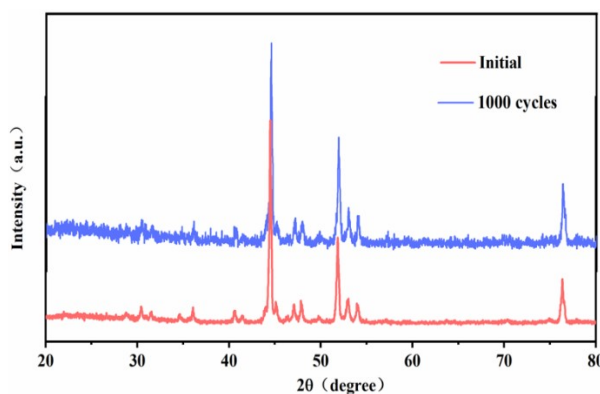

Fig. S12. The XRD spectra of 3D SHF- Ni<sub>5</sub>P<sub>4</sub> for HER after 1000 cycles.

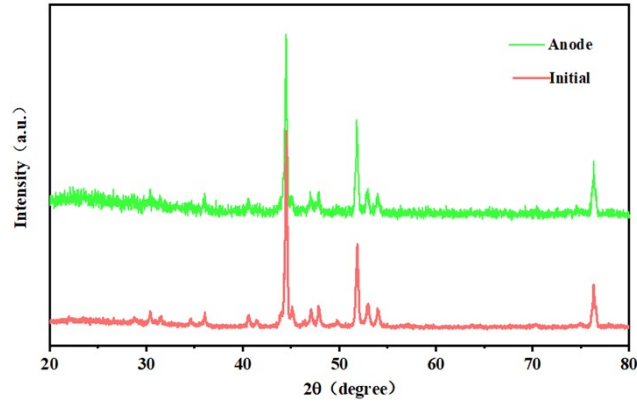

Fig. S13. The XRD spectra of 3D SHF- $\text{Ni}_5\text{P}_4$  as anode for water splitting after 24h.

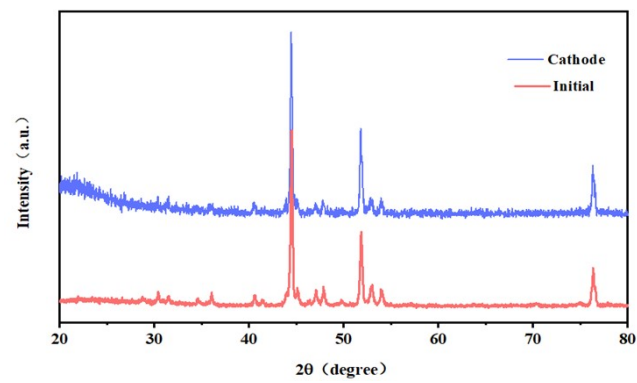

Fig. S14. The XRD spectra of 3D SHF- $\text{Ni}_5\text{P}_4$  as cathode for water splitting after 24 H.

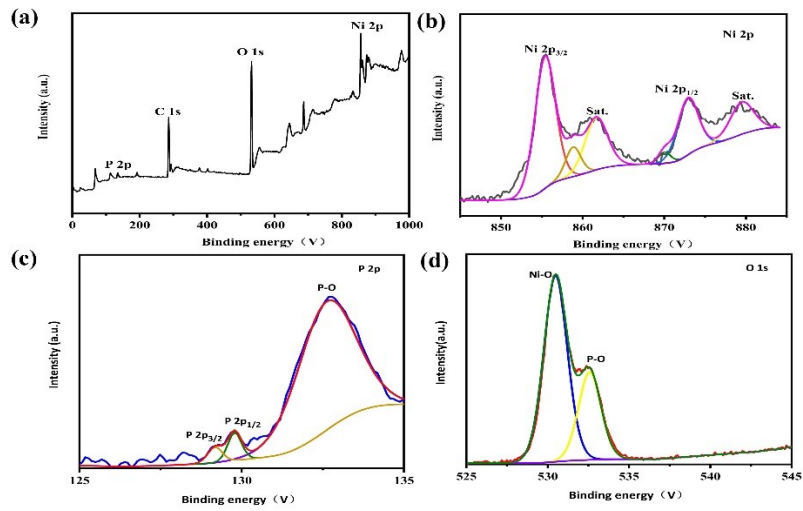

Fig. S15. XPS spectra of (a) a scan survey spectrum (b) Ni and (c) P after 22h of OER.

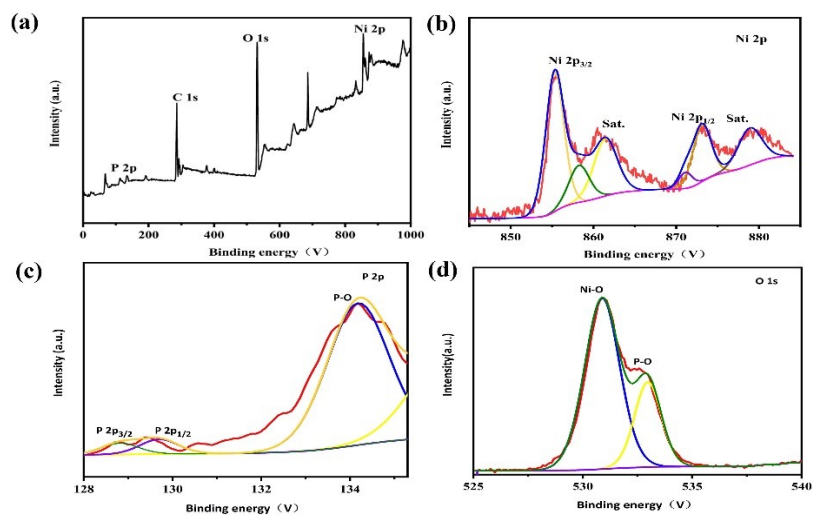

Fig. S16. XPS spectra of (a) a scan survey spectrum (b) Ni and (c) P after 22h of HER.

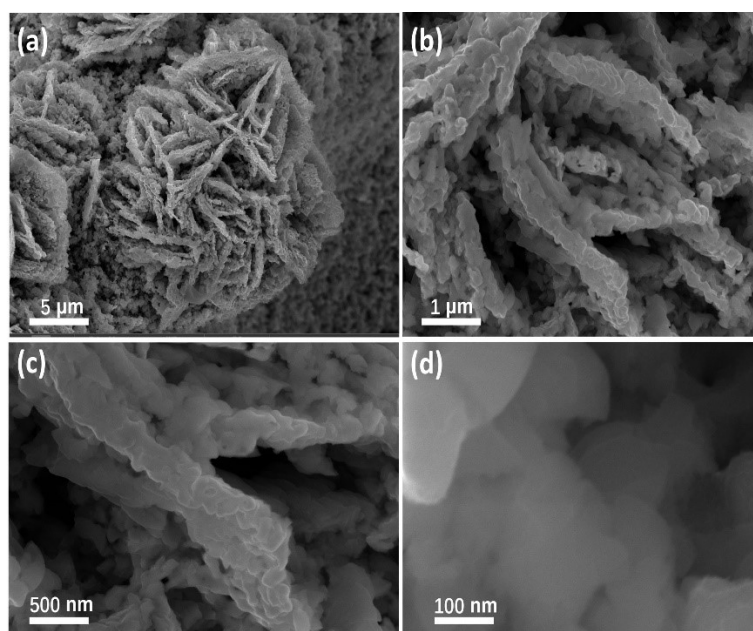

Fig. S17. (a-d) 3D SHF- Ni<sub>5</sub>P<sub>4</sub> for OER after 1000 cycles.

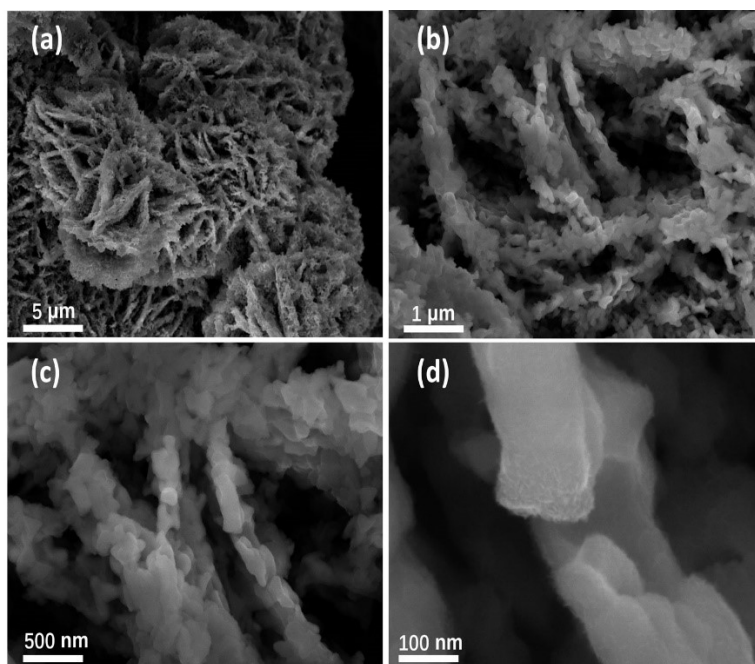

**Fig. S18.** (a-b) SEM of 3D SHF- Ni<sub>5</sub>P<sub>4</sub> for HER after 1000 cycles.

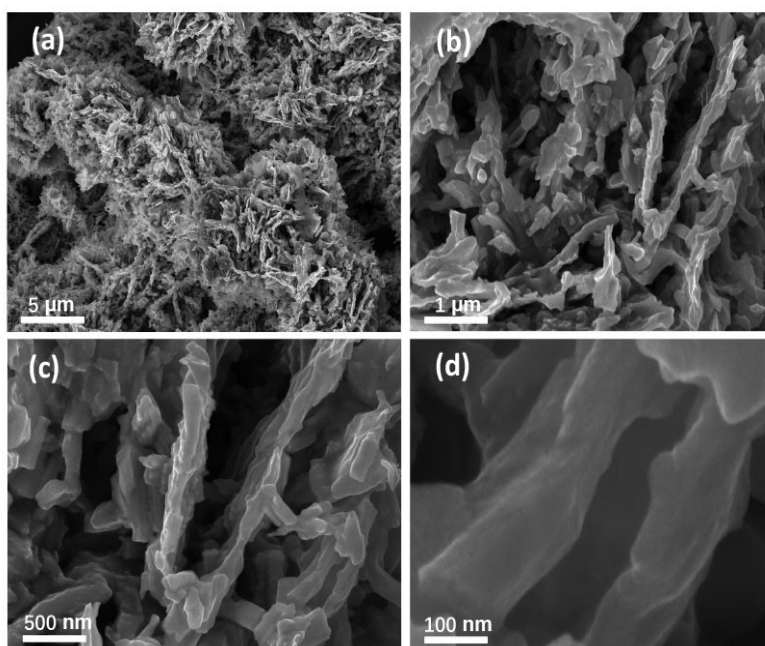

**Fig. S19.** (a-d) SEM of 3D SHF- Ni<sub>5</sub>P<sub>4</sub> for OER after 22h.



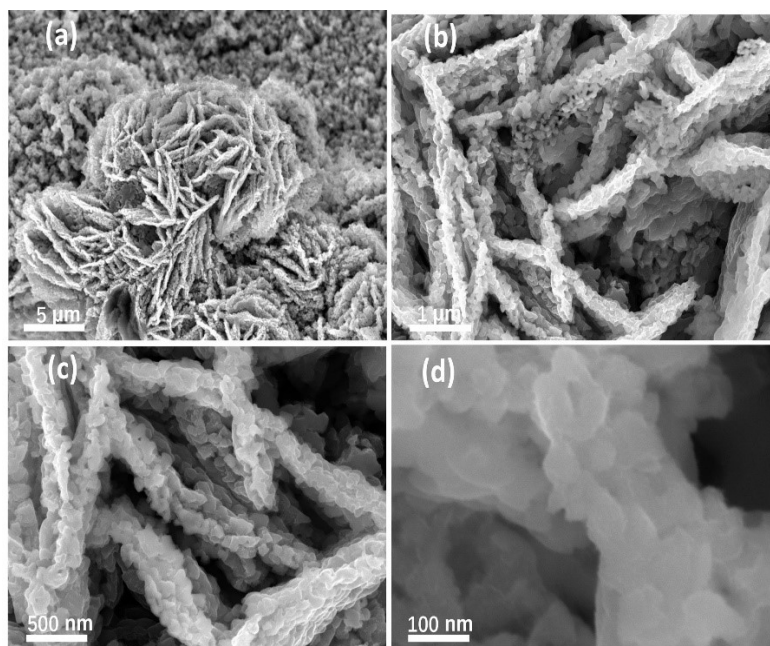

**Fig. S20.** (a-d) SEM of 3D SHF- Ni<sub>5</sub>P<sub>4</sub> for HER after 22h.

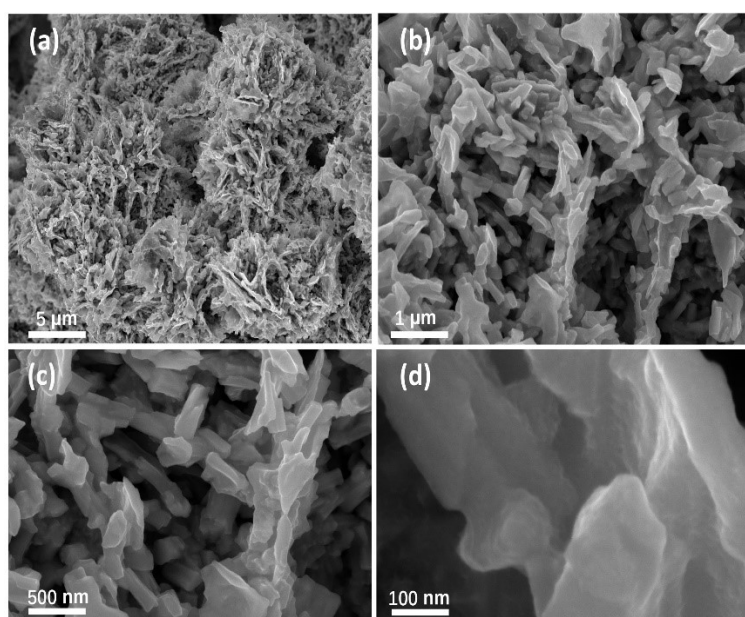

**Fig. S21.** (a-d) SEM of 3D SHF-Ni<sub>5</sub>P<sub>4</sub> as anode for water splitting after 24h.

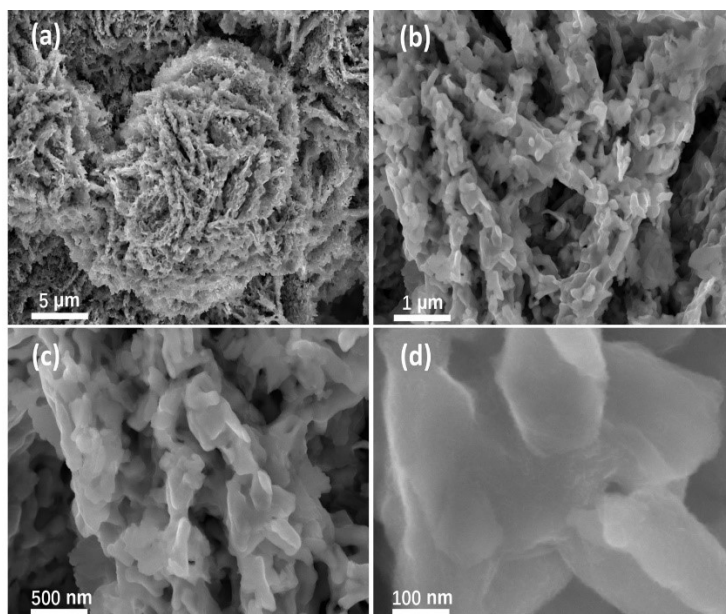

**Fig. S22.** (a-d) SEM of 3D SHF-Ni<sub>5</sub>P<sub>4</sub> as cathode for water splitting after 24h.

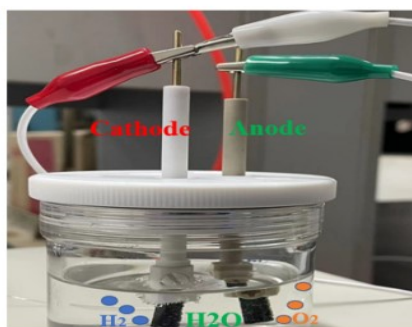

**Fig. S23.** Overall water splitting video and picture.

### OER and HER mechanism in alkaline

Based on published articles, the mechanisms of OER and HER in alkaline are as follows:

#### (1) OER mechanism

The mechanism of OER is complicated and still debatable on the anode catalysts. The OER mechanism involves the adsorption and desorption of intermediates, i.e.,

$\text{OH}_{\text{ads}} \rightarrow \text{O}_{\text{ads}} \rightarrow \text{OOH}_{\text{ads}} \rightarrow \text{O}_{2\text{ads}}$  process (adsorbate evolution mechanism, AEM). The steps of OER primitives under alkaline conditions are as follows:

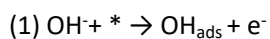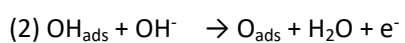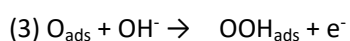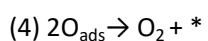

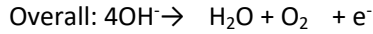

Where the \* represents the active sites on the catalyst surface, and the “ads” represents adsorbed state of intermediates ( $\text{OH}_{\text{ads}}$ ,  $\text{O}_{\text{ads}}$ ,  $\text{OOH}_{\text{ads}}$ ,  $\text{O}_{2\text{ads}}$ )

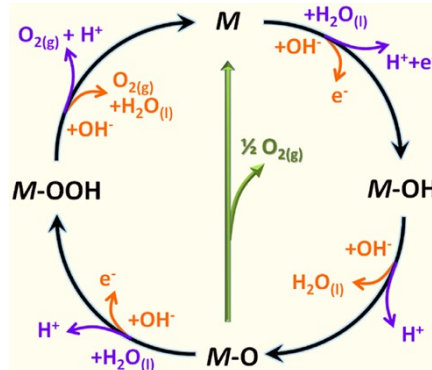

Fig. 1 Schematic diagram of OER mechanism<sup>[29]</sup>

(2) HER mechanism

In alkaline media, transition metal catalysts usually react with  $\text{H}_2\text{O}$  and  $\text{H}^*$  to generate  $\text{H}_2$ .

the first step of HER is to generate  $\text{H}^*$  by reaction with  $\text{H}_2\text{O}$ . The second step is the rate-determining step (RDS), which depends on the activity of these catalysts.

The steps of HER primitives under alkaline conditions are as follows:

- (1)  $\text{H}_2\text{O} + \text{e}^- \rightarrow \text{OH}^- + \text{H}_{\text{ads}}$  (Volmer)
- (2)  $\text{H}_{\text{ads}} + \text{H}_2\text{O} + \text{e}^- \rightarrow \text{OH}^- + \text{H}_2$  (Heyrovsky)
- (3)  $2\text{H}_{\text{ads}} \rightarrow \text{H}_2$  (Tafel)

Where the \* represents the active sites on the catalyst surface, and the “ads” represents adsorbed state of intermediates ( $\text{H}_{\text{ads}}$ )

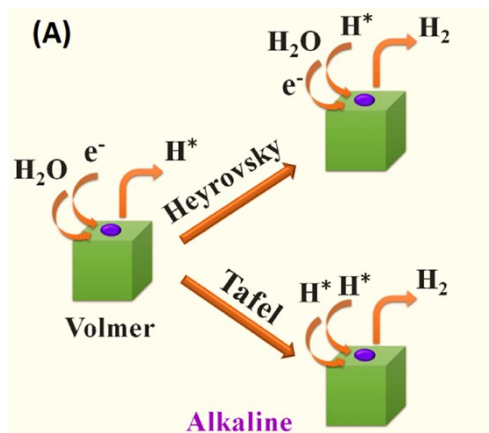

Fig. 2 Schematic diagram of HER mechanism in alkaline media<sup>[30]</sup>

According to reports, for HER reaction, the determination rate of the electrochemical reaction

can be judged according to the Tafel slope of the reaction. When the Tafel slope is  $120 \text{ mV dec}^{-1}$ , the RDS is the Volmer process. When Tafel slope is  $40 \text{ mV dec}^{-1}$ , RDS is Heyrovsky process. RDS is a Tafel process when the Tafel slope is  $30 \text{ mV dec}^{-1}$ . In this work, there is no Tafel slopes match the expected Tafel slopes of 30, 40, and  $120 \text{ mV dec}^{-1}$ , each of which correlate with a different rate-determining step of the HER. Although the Tafel analysis is useful in elucidating the rate-determining steps, too simplified discussion, fails to accurately describe the surface electrocatalysis. The relation between Tafel slope and reaction mechanism will be studied in the next part of this work.

**Table S2** Summary of various nickel phosphide catalytic electrodes

| for HER or OER                                                   |          |                       |           |                                    |          |           |
|------------------------------------------------------------------|----------|-----------------------|-----------|------------------------------------|----------|-----------|
| Catalyst                                                         |          | Current               | Potential | Electrolyte                        | Tafel    | Reference |
|                                                                  | Activity | density               |           |                                    | slope    |           |
|                                                                  |          | (mA/cm <sup>2</sup> ) |           |                                    | (mV/dec) |           |
| 3D SHF-Ni <sub>5</sub> P <sub>4</sub>                            | OER      | 10                    | 180       | 1 M KOH                            | 54       | This work |
|                                                                  | HER      | 10                    | 106       | 1 M KOH                            | 79.38    |           |
| N-C/Ni <sub>5</sub> P <sub>4</sub> /Fe <sub>3</sub> P            | OER      | 10                    | 252 mV    | 1 M KOH                            | 24       | [1]       |
| Ni <sub>5</sub> P <sub>4</sub> on Nickel foil                    | HER      | 10                    | 140 mV    | 0.5MH <sub>2</sub> SO <sub>4</sub> |          | [2]       |
|                                                                  |          |                       | 150 mV    | 1 M KOH                            |          |           |
| Ni <sub>5</sub> P <sub>4</sub> -Ni <sub>2</sub> P-NS             | HER      | 10                    | 120 mV    | 0.5MH <sub>2</sub> SO <sub>4</sub> | 79.1     | [3]       |
| CoP/ Ni <sub>5</sub> P <sub>4</sub> /CoP                         | HER      | 10                    | 33 mV     | 0.5MH <sub>2</sub> SO <sub>4</sub> | 43       | [4]       |
| Ni <sub>5</sub> P <sub>4</sub> /NF                               | HER      | 10                    | 64 mV     | 1 M KOH                            | 64       | [5]       |
| Ni <sub>5</sub> P <sub>4</sub> /NF                               | OER      | 10                    | 182 mV    | 1 M KOH                            | 58       | [5]       |
| Ni <sub>5</sub> P <sub>4</sub> @NiCo <sub>2</sub> O <sub>4</sub> | HER      | 10                    | 27 mV     | 1 M KOH                            | 27       | [6]       |

|                    |     |    |        |           |      |      |
|--------------------|-----|----|--------|-----------|------|------|
| S- Ni5P4 NPA/CP    | HER | 10 | 56 mV  | 1 M KOH   | 43.6 | [7]  |
| Ni5P4              | HER | 10 | 114 mV | 1MKOH     | 34   | [8]  |
| Ni5P4/NiP2/Ni2P    | HER | 10 | 120 mV | 0.5MH2SO4 | 47.3 | [9]  |
| Cuf@ Ni5P4         | HER | 10 | 90 mV  | 0.5MH2SO4 | 49   | [10] |
| WS2/ Ni5P4- Ni2P   | HER | 10 | 90 mV  | 0.5MH2SO4 | 74   | [11] |
| Ni5P4-Ru           | HER | 10 | 54 mV  | 1MKOH     | 52   | [12] |
| Co-doped (6.6at.%) | HER | 10 | 310 mV | 0.5MH2SO4 | 90   | [13] |
| Ni5P4              |     |    |        |           |      |      |
| CC@Ni-P            | HER | 10 | 93 mV  | 0.5MH2SO4 | 58.2 | [14] |
| Ni2P/Ni5P4@3DNG    | HER | 10 | 139 mV | 0.5MH2SO4 | 59   | [15] |
| Ni5P4/Ni2PFeNi@C   | OER | 10 | 242 mV | 1MKOH     | 46   | [16] |
| Co doping (i.e.,   | HER | 10 | 100.5  | 1MKOH     | 65.8 | [17] |
| 20%)- Ni5P4        |     |    | mV     |           |      |      |
| Ni5P4/C            | HER | 10 | 103 mV | 0.5MH2SO4 | 51   | [18] |
| MF-GrCNTs-Se-      | HER | 10 | 130 mV | 0.5MH2SO4 | 98   | [19] |
| Ni5P4              |     |    |        |           |      |      |

**Table S3** Summary of various nickel phosphide catalytic electrodes

for overall water splitting

| Catalyst | Activity | Current density<br>(mA/cm <sup>2</sup> ) | Potential | Electrolyte | Reference |
|----------|----------|------------------------------------------|-----------|-------------|-----------|
|----------|----------|------------------------------------------|-----------|-------------|-----------|

|                                               |                 |     |         |         |           |
|-----------------------------------------------|-----------------|-----|---------|---------|-----------|
| 3D SHF-Ni <sub>5</sub> P <sub>4</sub>         | HER             | 10  | 106 mV  | 1 M KOH | This work |
|                                               | OER             | 10  | 180 mV  |         |           |
|                                               | Water plitting  | 10  | 1.47V   |         |           |
| Ni <sub>0.975</sub> Fe <sub>0.025</sub> P@CC  | HER             | 10  | 131 mV  | 1 M KOH | [20]      |
|                                               | HER             | 100 | 257 mV  |         |           |
|                                               | Water plitting  | 10  | 1.50 V  |         |           |
| S-doped Ni-P                                  | HER             | 10  | 55      |         | [21]      |
|                                               | OER             | 10  | 229     |         |           |
|                                               | Water splitting | 10  | 1.51V   |         |           |
| Fe-Ni <sub>5</sub> P <sub>4</sub> /NiFeOH-350 | HER             | 10  | 197 mV  | 1 M KOH | [22]      |
|                                               | OER             | 10  | 221 mV  |         |           |
|                                               | Water plitting  | 10  | 1.55 V  |         |           |
| Zn/F NiCoP/NF                                 | HER             | 10  | 59      |         | [23]      |
|                                               | OER             | 10  | 285     |         |           |
|                                               | Water splitting | 10  | 1.568   |         |           |
| NixPy-325                                     | HER             | 20  | 160 mV  | 1 M KOH | [24]      |
|                                               | OER             | 10  | 320 mV  |         |           |
|                                               | Water plitting  | 10  | 1.57V   |         |           |
| D- Ni <sub>5</sub> P <sub>4</sub>   Fe        | HER             | 10  | 94.5 mV | 1 M KOH | [25]      |
|                                               | OER             | 10  | 217 mV  |         |           |
|                                               | Water plitting  | 10  | 1.59 V  |         |           |
| Ni <sub>2</sub> P/NiMoP <sub>2</sub> /CC      | HER             | 10  | 102     |         | [26]      |

|                                       |                 |    |      |      |
|---------------------------------------|-----------------|----|------|------|
|                                       | OER             | 10 | 230  |      |
|                                       | Water splitting | 10 | 1.59 |      |
| A-Ni <sub>2</sub> P/Cu <sub>3</sub> P | HER             | 10 | 88   | [27] |
|                                       | OER             | 10 | 262  |      |
|                                       | Water splitting | 10 | 1.60 |      |
| Fe, Rh- Ni <sub>2</sub> P/NF          | HER             | 10 | 73   | [28] |
|                                       | OER             | 30 | 226  |      |
|                                       | Water splitting | 10 | 1.62 |      |

---

## Reference

- 1 L. Zhang, C. Chang, C. W. Hsu, C. W. Chang and S.Y. Lu, *J. Mater. Chem. A.*, 2017, 537, 19656-19663.
- 2 M. Ledendecker, S. K. Calderon, C. Papp, H.P. Steinruck, M. Antonietti and M. Shalom, *Angew. Chem. Int.Ed.*, 2015, 54, 12361-12365.
- 3 G Wang, Y.V. Kolen'ko, X.Q. Bao, K. Kovnir and L. F. Liu, *Angew. Chem. Int.Ed.*,2015, 5428, 8188-8192.
- 4 K. Mishra, H. Q. Zhou, J. Y. Sun, F. Qin, K. Dahal, J. M. Bao, S. Chen and Z. F. Ren, *Energy. Environ. Sci.*, 2018, 11, 2246-2252.
- 5 G. Lai, X. B. Liu, Y. Q. Deng, H. Yang, H. H. Jiang, Z. C. Xiao and T. Liang, *Inorg. Chem. Commun.*, 2018, 97, 98-102.
- 6 Zhang, K. N. Yang, C. Wang, S. Y. Li, Q. Zhang, X. J Chang, J. Y. Li, S. M. Li, S. F. Jia, J. B. ang and L. Fu, *Advan. Energy. Mater.*, 2018,829,1801690.
- 7 F. Chang, K. Li, Z. J. Wu, J. J. Ge, C, P, Liu and W. Xing, *ACS Appl. Mater. Interface.*, 2018,1031,26303-26311.
- 8 C.S. Jung, K. Park, Y. R. Lee, I.H. Kwak, I.S. Kwon, J. D. Kim, J. Seo, J.P. Ahn and J. G. Park, *CrystEngComm*, 2019, 21, 1143-1149.
- 9 C. Hu, J. G. Cai, S. Liu, C. Lv, J. H. Luo, M. Duan, C. G. Chen, Y. Shi, J. F.Song, Z. Zhang, A. Watanabe, E. Aoyagi and S. Ito, *ACS Appl. Energy Mater.*, 2019, 31, 1036-1045.
- 10 M. Das, N. Jena, T. Purkait, N. Kamboj, A. De Sarkar and R.S. Dey, *J. Mater. Chem. A.*, 2019, 7, 23989-23999.
- 11 S. H. Yu, W. Z. Chen, H. Y. Wang, H. Pan and D. H. C. Chua, *Nano Energy*, 2019, 55, 193-202.
- 12 Q. He, D. Tian, H. L. Jiang, D. F. Cao, S. Q. Wei, D. B. Liu, P. Song, Y. Lin and L. Song, *Adv. Mater.*, 2020, 3211, 1906972.
- 13 X. Xiao, X. J. Wu, Y. H. Wang, K. Zhu, B. T. Liu, X. Q. Cai, T. Yang, X. Y. Xu and D. G. Zhang, *Catal. Commun.*,

- 2020, 138, 105957.
- 14 A. Y. Chen, L. Fu, W. J. Xiang, W. Wei, D. Liu and C. L. Liu, *Int. J. Hydrogen Energy.*, 2021, 46, 11701-11710.
- 15 G. S. Ding, Y. X. Zhang, J. Dong and L. B. Xu, *Mater. Lett.*, 2021, 299, 130071.
- 16 X. Y. Tian, P. Yi, J. W. Sun, C. Y. Li, R. Z. Liu and J. K. Sun, *Nanomaterials*, 2022, 1211, 1848.
- 17 C. C. Miao, Y. M. Zang, H. Wang, X. M. Zhuang, N. Han, Y. X. Yin, Y. D. Ma, M. Chen, Y. Dai, S. P. Yip, J. C. Ho and Z. X. Yang, *Adv. Mater. Interfaces.*, 2022, 9, 2200739.
- [18 H. M. Li, S. Q. Lu, J. Y. Sun, J. J. Pei, D. Liu, Y. R. Xue, J. J. Mao, W. Zhu and Z. B. Zhuang, *Chem. Eur. J.*, 2018, 2445, 11748-11754.
- 19 M. Pahuja, S. Riyajuddin, M. Afshan, S. A. Siddiqui, J. Sultana, T. Maruyama and K. Ghosh, *ACS Appl. Nano Mater.*, 2022, 51, 1385-1396.
- 20 T. G. Ma, Y. F. Qiu, Y. Y. Zhang, X. Y. Ji and P. A. Hu, *ACS Appl. Energy. Mater.*, 2019, 25, 3091-3099.
- 21 M. A. Ashraf, Y. f. Yang, D. Q. Zhang and B. T. Pham, *J. Colloid. Interface. Sci.*, 2020, 577, 265-278.
- 22 C. F. Li, J. W. Zhao, L. J. Xie, J. Q. Wu and G. R. Li, *Appl. Catal. B Environ.*, 2021, 291, 119987.
- 23 J. J. Zhu, X. Y. Zheng, C. C. Liu, Y. K. Lu, Y. Liu, D. Li and D. L. Jiang, *J. Colloid. Interface. Sci.*, 2023, 630, 559-569.
- 24 J. Y. Li, J. Li, X. M. Zhou, Z. M. Xia, W. Gao, Y. Y. Ma and Y. Q. Qu, *ACS Appl. Mater. Interfaces.*, 2016, 817, 10826-10834.
- 25 J. L. Qi, T. X. Xu, J. Cao, S. Guo, Z. X. Zhong and J. C. Feng, *Nanoscale*, 2020, 1210, 6204-6210.
- 26 J. H. Lin, Y. T. Yan, T. X. Xu, J. Cao, X. H. Zheng, J. C. Feng and J. L. Qi, *J. Colloid. Interface. Sci.*, 2020, 564, 37-42.
- 27 L. Sun, S. T. Zhao, L. N. Sha, G. L. Zhuang, X. J. Wang and X. G. Han, *J. Colloid. Interface. Sci.*, 2023, 637, 76-84.
- 28 T. Chen, J. J. Duan, J. J. Feng, L. P. Mei, Y. Jiao, L. Zhang and A. J. Wang, *J. Colloid. Interface. Sci.*, 2022, 605, 888-896.
- 29 T. Shinagawa, A. Garcia-Esparza, K. Takanabe, *Sci. Rep.*, 2015, 5, 13801
- 30 Z. Li, B. Li, M. Yu, C. Yu and P. Shen, *International Journal of Hydrogen Energy*, 2022, 47, 26956-26977
